# Supplementary material for: Polarization in Flood Risk Management? Sensitivity of Norm Perception and Responsibility Attribution to Frequent Flood Experience
Source: Copernicus journal article supplement (doi:10.5194/nhess-25-4983-2025), 2025-12-17
Supplement: Supplementary file 1 [file nhess-25-4983-2025-supplement.pdf]

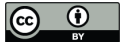

*Supplement of*

## **Polarization in Flood Risk Management? Sensitivity of Norm Perception and Responsibility Attribution to Frequent Flood Experience**

**Lisa Köhler et al.**

*Correspondence to:* Lisa Köhler ([lisa.koehler@uni-potsdam.de](mailto:lisa.koehler@uni-potsdam.de))

The copyright of individual parts of the supplement might differ from the article licence.

# Supplement: Survey Questionnaire

**Als Einstieg in den Fragebogen bitten wir Sie, Ihren persönlichen Teilnahmecode anzulegen. Dieser Teilnahmecode ist aus zwei Gründen wichtig.** 1) Sie haben zu jedem späteren Zeitpunkt die Möglichkeit, Ihre Angaben im Fragebogen zu widerrufen (datenschutz@ufz.de). 2.) Über diesen Code kann der Fragebogen aus diesem Jahr und der Fragebogen aus dem nächsten Jahr ein und der selben Person anonym zugeordnet werden.

**1. Bitte tragen Sie folgende Buchstaben bzw. Zahl in der vorgegebenen Reihenfolge in das nebenstehende Feld ein:**

1. ... den ersten Buchstaben Ihres Geburtsortes (z.B. **M**ittweida),
2. ... den dritten Buchstaben Ihres Vornamens (z.B. An**T**on),
3. ... die letzte Ziffer Ihres Geburtsjahres (z.B. 197**1**) sowie
4. ... den ersten Buchstaben des Vornamens Ihrer Mutter (z.B. In**G**e).

|    |    |    |    |
|----|----|----|----|
|    |    |    |    |
| 1. | 2. | 3. | 4. |

**Zu Beginn möchten wir Ihnen einige Fragen zu Ihrer persönlichen Erfahrung mit Überschwemmungsereignissen stellen.**

**2. Wie häufig waren Sie in der Vergangenheit bereits persönlich von einer Überschwemmung (z.B. Flusshochwasser oder Starkregen) betroffen?**

- ☐ Noch nie                                      → Bitte weiter mit Frage 8
- ☐ Einmal                                      ☐ Zweimal                                      ☐ Dreimal oder mehr

**3. Wann genau war das letzte Überschwemmungsereignis?**

Monat: ..... Jahr: .....

**4. Wie schwerwiegend war diese Erfahrung für Sie (z.B. wegen Evakuierung, gesundheitlichen Folgen, finanziellen Schäden oder Personenschäden)?**

Überhaupt nicht schwerwiegend    ☐ 1    ☐ 2    ☐ 3    ☐ 4    ☐ 5    ☐ 6    ☐ 7    Sehr schwerwiegend

**5. Wie machtlos haben Sie sich bei dieser Überschwemmung gefühlt?**

Überhaupt nicht machtlos    ☐ 1    ☐ 2    ☐ 3    ☐ 4    ☐ 5    ☐ 6    ☐ 7    Sehr machtlos

**6. An wie viele Details können Sie sich erinnern, wenn Sie an die letzte Überschwemmung denken?**

Sehr wenige Details    ☐ 1    ☐ 2    ☐ 3    ☐ 4    ☐ 5    ☐ 6    ☐ 7    Sehr viele Details

**7. Wie sehr belastet Sie die letzte Überschwemmung heute noch?**

Es belastet mich heute gar nicht mehr    ☐ 1    ☐ 2    ☐ 3    ☐ 4    ☐ 5    ☐ 6    ☐ 7    Es belastet mich immer noch sehr

Als nächstes interessiert uns, wie sehr Sie sich mit den Menschen in Mittweida identifizieren.

8. Bitte geben Sie an, ob Sie der Aussage eher zustimmen oder eher nicht zustimmen.

Ich identifiziere mich mit den Menschen in Mittweida.

Stimme  
gar nicht zu

1

2

3

4

5

6

7

Stimme  
vollkommen zu

Nun haben wir einige Fragen zu Ihrer Einschätzung zukünftiger Überschwemmungsereignisse beziehungsweise der dadurch verursachten Schäden.

9. Für wie wahrscheinlich halten Sie das Auftreten einer schweren Überschwemmung innerhalb der nächsten 5 Jahre in Ihrer Wohnung?

Sehr  
unwahrscheinlich

1

2

3

4

5

6

7

Sehr  
wahrscheinlich

10. Für wie groß erwarten Sie die Schäden an Ihrer Wohnung bei solch einem Ereignis?

Keine Schäden

1

2

3

4

5

6

7

Sehr große  
Schäden

11. Für wie wahrscheinlich halten Sie das Auftreten einer schweren Überschwemmung innerhalb der nächsten 5 Jahre in Mittweida?

Sehr  
unwahrscheinlich

1

2

3

4

5

6

7

Sehr  
wahrscheinlich

12. Für wie groß erwarten Sie die Schäden in Mittweida im Fall eines solchen Ereignisses?

Keine Schäden

1

2

3

4

5

6

7

Sehr große  
Schäden

13. Als nächstes bitten wir Sie, uns den folgenden Satz zu ergänzen: Der Gedanke an eine zukünftige Überschwemmung in Mittweida macht mir ...

... keine Angst

1

2

3

4

5

6

7

... sehr große  
Angst

14. Wenn ich über zukünftige Überschwemmungsereignisse nachdenke, fühle ich mich hilflos.

Stimme gar  
nicht zu

1

2

3

4

5

6

7

Stimme  
vollkommen zu

15. Wir nennen Ihnen jetzt eine Reihe von Aussagen. Bitte geben Sie an, ob Sie den Aussagen eher zustimmen oder eher nicht zustimmen.

|                                                                                                                                     | Stimme gar<br>nicht zu         |                                |                                |                                | Stimme<br>vollkommen zu        |                                |                                |
|-------------------------------------------------------------------------------------------------------------------------------------|--------------------------------|--------------------------------|--------------------------------|--------------------------------|--------------------------------|--------------------------------|--------------------------------|
| Ich weiß, welche Vorsorgemaßnahmen ich in meiner Wohnung gesetzlich umsetzen darf, um mich vor Überschwemmungen zu schützen.        | <input type="text" value="1"/> | <input type="text" value="2"/> | <input type="text" value="3"/> | <input type="text" value="4"/> | <input type="text" value="5"/> | <input type="text" value="6"/> | <input type="text" value="7"/> |
| Ich traue mir zu, meine Wohnung durch die Umsetzung von Vorsorgemaßnahmen vor Überschwemmungen schützen zu können.                  | <input type="text" value="1"/> | <input type="text" value="2"/> | <input type="text" value="3"/> | <input type="text" value="4"/> | <input type="text" value="5"/> | <input type="text" value="6"/> | <input type="text" value="7"/> |
| Ich selbst kann Vorkehrungen gegen Überschwemmungsschäden treffen.                                                                  | <input type="text" value="1"/> | <input type="text" value="2"/> | <input type="text" value="3"/> | <input type="text" value="4"/> | <input type="text" value="5"/> | <input type="text" value="6"/> | <input type="text" value="7"/> |
| Ich kann mich gut auf zukünftige Überschwemmungen vorbereiten.                                                                      | <input type="text" value="1"/> | <input type="text" value="2"/> | <input type="text" value="3"/> | <input type="text" value="4"/> | <input type="text" value="5"/> | <input type="text" value="6"/> | <input type="text" value="7"/> |
| Ich fühle mich moralisch verpflichtet, mit anderen zusammen den Hochwasserschutz in Mittweida zu verbessern.                        | <input type="text" value="1"/> | <input type="text" value="2"/> | <input type="text" value="3"/> | <input type="text" value="4"/> | <input type="text" value="5"/> | <input type="text" value="6"/> | <input type="text" value="7"/> |
| Ich habe ein schlechtes Gewissen, wenn ich <u>nicht</u> an Aktionen zur Verbesserung des Hochwasserschutzes in Mittweida teilnehme. | <input type="text" value="1"/> | <input type="text" value="2"/> | <input type="text" value="3"/> | <input type="text" value="4"/> | <input type="text" value="5"/> | <input type="text" value="6"/> | <input type="text" value="7"/> |

16. Die folgenden Aussagen erfragen, wie Sie die Fähigkeit Ihrer Kommune beziehungsweise der Menschen in Mittweida im Umgang mit Überschwemmungsereignissen wahrnehmen.

|                                                                                                                          | Stimme gar<br>nicht zu         |                                |                                |                                | Stimme<br>vollkommen zu        |                                |                                |
|--------------------------------------------------------------------------------------------------------------------------|--------------------------------|--------------------------------|--------------------------------|--------------------------------|--------------------------------|--------------------------------|--------------------------------|
| Gemeinsam können wir einen wirksamen Beitrag leisten, um den Hochwasserschutz in Mittweida zu verbessern.                | <input type="text" value="1"/> | <input type="text" value="2"/> | <input type="text" value="3"/> | <input type="text" value="4"/> | <input type="text" value="5"/> | <input type="text" value="6"/> | <input type="text" value="7"/> |
| Die Menschen in Mittweida haben das gemeinsame Ziel, Überschwemmungs-schäden zu verringern.                              | <input type="text" value="1"/> | <input type="text" value="2"/> | <input type="text" value="3"/> | <input type="text" value="4"/> | <input type="text" value="5"/> | <input type="text" value="6"/> | <input type="text" value="7"/> |
| Die Menschen in Mittweida engagieren sich aktiv für einen besseren Hochwasserschutz.                                     | <input type="text" value="1"/> | <input type="text" value="2"/> | <input type="text" value="3"/> | <input type="text" value="4"/> | <input type="text" value="5"/> | <input type="text" value="6"/> | <input type="text" value="7"/> |
| Der Hochwasserschutz in Mittweida verändert sich durch das gemeinsame Bemühen der Menschen in der Kommune zum Positiven. | <input type="text" value="1"/> | <input type="text" value="2"/> | <input type="text" value="3"/> | <input type="text" value="4"/> | <input type="text" value="5"/> | <input type="text" value="6"/> | <input type="text" value="7"/> |

17. Als nächstes wollen wir erfragen, wie, Ihrer Meinung nach, die Menschen in Mittweida zum Thema private Hochwasservorsorge eingestellt sind.

|  | Stimme gar<br>nicht zu         |                                |                                |                                | Stimme<br>vollkommen zu        |                                |                                |
|--|--------------------------------|--------------------------------|--------------------------------|--------------------------------|--------------------------------|--------------------------------|--------------------------------|
|  | <input type="text" value="1"/> | <input type="text" value="2"/> | <input type="text" value="3"/> | <input type="text" value="4"/> | <input type="text" value="5"/> | <input type="text" value="6"/> | <input type="text" value="7"/> |

|                                                                                                                  |                                |                                |                                |                                |                                |                                |                                |
|------------------------------------------------------------------------------------------------------------------|--------------------------------|--------------------------------|--------------------------------|--------------------------------|--------------------------------|--------------------------------|--------------------------------|
| Die meisten Menschen in Mittweida erwarten von mir, dass ich mich selbst vor Überschwemmungen schütze.           | <input type="text" value="1"/> | <input type="text" value="2"/> | <input type="text" value="3"/> | <input type="text" value="4"/> | <input type="text" value="5"/> | <input type="text" value="6"/> | <input type="text" value="7"/> |
| Die meisten Menschen in Mittweida sind der Meinung, dass sich jeder selbst vor Überschwemmungen schützen sollte. | <input type="text" value="1"/> | <input type="text" value="2"/> | <input type="text" value="3"/> | <input type="text" value="4"/> | <input type="text" value="5"/> | <input type="text" value="6"/> | <input type="text" value="7"/> |
| Die meisten Menschen in Mittweida setzen privat Vorsorgemaßnahmen um, um sich vor Überschwemmungen zu schützen.  | <input type="text" value="1"/> | <input type="text" value="2"/> | <input type="text" value="3"/> | <input type="text" value="4"/> | <input type="text" value="5"/> | <input type="text" value="6"/> | <input type="text" value="7"/> |
| Die meisten Menschen in Mittweida ergreifen vorbeugende Maßnahmen, um sich vor Überschwemmungen zu schützen.     | <input type="text" value="1"/> | <input type="text" value="2"/> | <input type="text" value="3"/> | <input type="text" value="4"/> | <input type="text" value="5"/> | <input type="text" value="6"/> | <input type="text" value="7"/> |

18. Ergänzend dazu erfragen die folgenden Aussagen, wie, Ihrer Meinung nach, die Menschen von Mittweida hinsichtlich des gemeinsamen Hochwasserschutzes eingestellt sind.

|                                                                                                                   | Stimme gar nicht zu            |                                |                                |                                | Stimme vollkommen zu           |                                |                                |
|-------------------------------------------------------------------------------------------------------------------|--------------------------------|--------------------------------|--------------------------------|--------------------------------|--------------------------------|--------------------------------|--------------------------------|
| Die meisten Menschen in Mittweida sind der Meinung, dass man sich gemeinsam vor Überschwemmungen schützen sollte. | <input type="text" value="1"/> | <input type="text" value="2"/> | <input type="text" value="3"/> | <input type="text" value="4"/> | <input type="text" value="5"/> | <input type="text" value="6"/> | <input type="text" value="7"/> |
| Die meisten Menschen in Mittweida setzen sich aktiv für die Verbesserung des Hochwasserschutzes der Kommune ein.  | <input type="text" value="1"/> | <input type="text" value="2"/> | <input type="text" value="3"/> | <input type="text" value="4"/> | <input type="text" value="5"/> | <input type="text" value="6"/> | <input type="text" value="7"/> |
| Bei einer Überschwemmung würden mir viele Menschen helfen.                                                        | <input type="text" value="1"/> | <input type="text" value="2"/> | <input type="text" value="3"/> | <input type="text" value="4"/> | <input type="text" value="5"/> | <input type="text" value="6"/> | <input type="text" value="7"/> |

19. Inwieweit haben Sie in Folge einer Überschwemmung in der Vergangenheit bereits Unterstützung erhalten (z.B. aus dem privaten Umfeld, von Bekannten oder Fremden)?

|                     |                                |                                |                                |                                |                                |                                |                                |                         |
|---------------------|--------------------------------|--------------------------------|--------------------------------|--------------------------------|--------------------------------|--------------------------------|--------------------------------|-------------------------|
| Keine Unterstützung | <input type="text" value="1"/> | <input type="text" value="2"/> | <input type="text" value="3"/> | <input type="text" value="4"/> | <input type="text" value="5"/> | <input type="text" value="6"/> | <input type="text" value="7"/> | Sehr viel Unterstützung |
|---------------------|--------------------------------|--------------------------------|--------------------------------|--------------------------------|--------------------------------|--------------------------------|--------------------------------|-------------------------|

☐ Trifft nicht zu, da ich noch nie von einer Überschwemmung betroffen war

→ Bitte weiter mit Frage 21

20. Wenn Sie Unterstützung erhalten haben, von welchen Personen, Einrichtungen oder Firmen (z.B. durch die Familien, die Stadt/Kommune, Versicherung etc.)?

.....

.....

.....

.....

**Um Schäden durch Überschwemmungen vorzubeugen, kann man unterschiedliche private Vorsorgemaßnahmen treffen. Wir haben nachfolgend nun einige Fragen zu diesem Thema.**

21. Wie **wirksam** halten Sie die aufgelisteten Vorsorgemaßnahmen, um Überschwemmungsschäden zu verringern?

|                                                                       | Gar nicht<br>wirksam       |                            |                            |                            | Sehr<br>wirksam            |                            |                            |
|-----------------------------------------------------------------------|----------------------------|----------------------------|----------------------------|----------------------------|----------------------------|----------------------------|----------------------------|
| Sichere Aufbewahrung von persönlichen Wertgegenständen und Dokumenten | <input type="checkbox"/> 1 | <input type="checkbox"/> 2 | <input type="checkbox"/> 3 | <input type="checkbox"/> 4 | <input type="checkbox"/> 5 | <input type="checkbox"/> 6 | <input type="checkbox"/> 7 |
| Abschluss einer Elementarschadens-versicherung                        | <input type="checkbox"/> 1 | <input type="checkbox"/> 2 | <input type="checkbox"/> 3 | <input type="checkbox"/> 4 | <input type="checkbox"/> 5 | <input type="checkbox"/> 6 | <input type="checkbox"/> 7 |
| Bauliche Vorsorgemaßnahmen am Wohngebäude                             | <input type="checkbox"/> 1 | <input type="checkbox"/> 2 | <input type="checkbox"/> 3 | <input type="checkbox"/> 4 | <input type="checkbox"/> 5 | <input type="checkbox"/> 6 | <input type="checkbox"/> 7 |
| Umzug in ein Gebiet ohne Überschwemmungsrisiko                        | <input type="checkbox"/> 1 | <input type="checkbox"/> 2 | <input type="checkbox"/> 3 | <input type="checkbox"/> 4 | <input type="checkbox"/> 5 | <input type="checkbox"/> 6 | <input type="checkbox"/> 7 |
| Andere Maßnahme: .....                                                | <input type="checkbox"/> 1 | <input type="checkbox"/> 2 | <input type="checkbox"/> 3 | <input type="checkbox"/> 4 | <input type="checkbox"/> 5 | <input type="checkbox"/> 6 | <input type="checkbox"/> 7 |

22. Wir bitten Sie jetzt anzugeben, ob Sie eine der genannten Maßnahmen in den **nächsten 6 Monaten beabsichtigen umzusetzen** bzw. **bereits umgesetzt** haben.

|                                                                       | Keine<br>Absicht           |                            |                            |                            | Starke<br>Absicht          |                            |                            | Bereits<br>umgesetzt     |
|-----------------------------------------------------------------------|----------------------------|----------------------------|----------------------------|----------------------------|----------------------------|----------------------------|----------------------------|--------------------------|
| Sichere Aufbewahrung von persönlichen Wertgegenständen und Dokumenten | <input type="checkbox"/> 1 | <input type="checkbox"/> 2 | <input type="checkbox"/> 3 | <input type="checkbox"/> 4 | <input type="checkbox"/> 5 | <input type="checkbox"/> 6 | <input type="checkbox"/> 7 | <input type="checkbox"/> |
| Abschluss einer Elementarschadens-versicherung                        | <input type="checkbox"/> 1 | <input type="checkbox"/> 2 | <input type="checkbox"/> 3 | <input type="checkbox"/> 4 | <input type="checkbox"/> 5 | <input type="checkbox"/> 6 | <input type="checkbox"/> 7 | <input type="checkbox"/> |
| Bauliche Vorsorgemaßnahmen am Wohngebäude                             | <input type="checkbox"/> 1 | <input type="checkbox"/> 2 | <input type="checkbox"/> 3 | <input type="checkbox"/> 4 | <input type="checkbox"/> 5 | <input type="checkbox"/> 6 | <input type="checkbox"/> 7 | <input type="checkbox"/> |
| Umzug in ein Gebiet ohne Überschwemmungsrisiko                        | <input type="checkbox"/> 1 | <input type="checkbox"/> 2 | <input type="checkbox"/> 3 | <input type="checkbox"/> 4 | <input type="checkbox"/> 5 | <input type="checkbox"/> 6 | <input type="checkbox"/> 7 | <input type="checkbox"/> |
| Andere Maßnahme: .....                                                | <input type="checkbox"/> 1 | <input type="checkbox"/> 2 | <input type="checkbox"/> 3 | <input type="checkbox"/> 4 | <input type="checkbox"/> 5 | <input type="checkbox"/> 6 | <input type="checkbox"/> 7 | <input type="checkbox"/> |

23. Abschließend bitten wir Sie anzugeben, für wie groß Sie Ihren persönlichen Aufwand einschätzen, um die folgenden Maßnahmen umzusetzen beziehungsweise wie groß Ihr persönlicher Aufwand war, als Sie die Maßnahmen bereits umsetzten.

|                                                                       | Sehr geringer Aufwand      |                            |                            |                            |                            | Sehr großer Aufwand        |                            |
|-----------------------------------------------------------------------|----------------------------|----------------------------|----------------------------|----------------------------|----------------------------|----------------------------|----------------------------|
| Sichere Aufbewahrung von persönlichen Wertgegenständen und Dokumenten | <input type="checkbox"/> 1 | <input type="checkbox"/> 2 | <input type="checkbox"/> 3 | <input type="checkbox"/> 4 | <input type="checkbox"/> 5 | <input type="checkbox"/> 6 | <input type="checkbox"/> 7 |
| Abschluss einer Elementarschadens-versicherung                        | <input type="checkbox"/> 1 | <input type="checkbox"/> 2 | <input type="checkbox"/> 3 | <input type="checkbox"/> 4 | <input type="checkbox"/> 5 | <input type="checkbox"/> 6 | <input type="checkbox"/> 7 |
| Bauliche Vorsorgemaßnahmen am Wohngebäude                             | <input type="checkbox"/> 1 | <input type="checkbox"/> 2 | <input type="checkbox"/> 3 | <input type="checkbox"/> 4 | <input type="checkbox"/> 5 | <input type="checkbox"/> 6 | <input type="checkbox"/> 7 |
| Umzug in ein Gebiet ohne Überschwemmungsrisiko                        | <input type="checkbox"/> 1 | <input type="checkbox"/> 2 | <input type="checkbox"/> 3 | <input type="checkbox"/> 4 | <input type="checkbox"/> 5 | <input type="checkbox"/> 6 | <input type="checkbox"/> 7 |
| Andere Maßnahme: .....                                                | <input type="checkbox"/> 1 | <input type="checkbox"/> 2 | <input type="checkbox"/> 3 | <input type="checkbox"/> 4 | <input type="checkbox"/> 5 | <input type="checkbox"/> 6 | <input type="checkbox"/> 7 |

24. Wenn Sie möchten, können Sie uns an dieser Stelle ausführlicher darlegen, was Sie über die Vorsorgemaßnahmen, deren Wirksamkeit, Umsetzbarkeit und den damit verbundenen Aufwand denken.

.....

.....

.....

.....

.....

.....

25. Welche Lösungen zur Schadensverringierung von Überschwemmungen sind Ihnen neben den oben aufgelisteten noch bekannt?

.....

.....

.....

.....

.....

.....

**Im Folgenden interessiert uns, wie sehr Sie den Schutzmaßnahmen in Mittweida vertrauen und welche Verantwortung, Ihrer Meinung nach, welche Akteure haben.**

**26. Bitte geben Sie an, ob Sie den Aussagen eher zustimmen oder eher nicht zustimmen.**

|                                                                                                                | Stimme gar<br>nicht zu     |                            |                            |                            |                            | Stimme<br>vollkommen zu    |                            |
|----------------------------------------------------------------------------------------------------------------|----------------------------|----------------------------|----------------------------|----------------------------|----------------------------|----------------------------|----------------------------|
| Ich vertraue darauf, dass es in Mittweida einen guten Hochwasserschutz gibt.                                   | <input type="checkbox"/> 1 | <input type="checkbox"/> 2 | <input type="checkbox"/> 3 | <input type="checkbox"/> 4 | <input type="checkbox"/> 5 | <input type="checkbox"/> 6 | <input type="checkbox"/> 7 |
| Ich bin persönlich für die Verringerung von Überschwemmungsschäden verantwortlich.                             | <input type="checkbox"/> 1 | <input type="checkbox"/> 2 | <input type="checkbox"/> 3 | <input type="checkbox"/> 4 | <input type="checkbox"/> 5 | <input type="checkbox"/> 6 | <input type="checkbox"/> 7 |
| Wir, die Menschen in Mittweida, sind gemeinsam für die Verringerung der Überschwemmungsschäden verantwortlich. | <input type="checkbox"/> 1 | <input type="checkbox"/> 2 | <input type="checkbox"/> 3 | <input type="checkbox"/> 4 | <input type="checkbox"/> 5 | <input type="checkbox"/> 6 | <input type="checkbox"/> 7 |
| Die Stadt Mittweida ist für die Verringerung der Überschwemmungsschäden verantwortlich.                        | <input type="checkbox"/> 1 | <input type="checkbox"/> 2 | <input type="checkbox"/> 3 | <input type="checkbox"/> 4 | <input type="checkbox"/> 5 | <input type="checkbox"/> 6 | <input type="checkbox"/> 7 |
| Der Staat und seine Organe sind für die Verringerung von Überschwemmungsschäden verantwortlich.                | <input type="checkbox"/> 1 | <input type="checkbox"/> 2 | <input type="checkbox"/> 3 | <input type="checkbox"/> 4 | <input type="checkbox"/> 5 | <input type="checkbox"/> 6 | <input type="checkbox"/> 7 |

**Abschließend haben wir zum Thema Überschwemmungen noch die folgenden Aussagen.**

**27. Bitte geben Sie an, ob Sie den Aussagen eher zustimmen oder eher nicht zustimmen.**

|                                                                                               | Stimme gar<br>nicht zu     |                            |                            |                            |                            | Stimme<br>vollkommen zu    |                            |
|-----------------------------------------------------------------------------------------------|----------------------------|----------------------------|----------------------------|----------------------------|----------------------------|----------------------------|----------------------------|
| Neben allen menschlichen Ursachen ist eine Überschwemmung immer auch ein Werk höherer Mächte. | <input type="checkbox"/> 1 | <input type="checkbox"/> 2 | <input type="checkbox"/> 3 | <input type="checkbox"/> 4 | <input type="checkbox"/> 5 | <input type="checkbox"/> 6 | <input type="checkbox"/> 7 |
| Die aktuelle Gefährdung durch Überschwemmungen wird allgemein übertrieben dargestellt.        | <input type="checkbox"/> 1 | <input type="checkbox"/> 2 | <input type="checkbox"/> 3 | <input type="checkbox"/> 4 | <input type="checkbox"/> 5 | <input type="checkbox"/> 6 | <input type="checkbox"/> 7 |
| Die nächste Überschwemmung wird bestimmt nicht so schnell kommen, wie man derzeit erwartet.   | <input type="checkbox"/> 1 | <input type="checkbox"/> 2 | <input type="checkbox"/> 3 | <input type="checkbox"/> 4 | <input type="checkbox"/> 5 | <input type="checkbox"/> 6 | <input type="checkbox"/> 7 |
| Durch den Klimawandel steigt die Gefahr für das Auftreten von Überschwemmungen.               | <input type="checkbox"/> 1 | <input type="checkbox"/> 2 | <input type="checkbox"/> 3 | <input type="checkbox"/> 4 | <input type="checkbox"/> 5 | <input type="checkbox"/> 6 | <input type="checkbox"/> 7 |
| Die letzten Überschwemmungen in Deutschland sind auf den Klimawandel zurückzuführen.          | <input type="checkbox"/> 1 | <input type="checkbox"/> 2 | <input type="checkbox"/> 3 | <input type="checkbox"/> 4 | <input type="checkbox"/> 5 | <input type="checkbox"/> 6 | <input type="checkbox"/> 7 |



**Nun wechseln wir das Thema. Im Folgenden möchten wir gern von Ihnen erfahren, welche Einschätzung und Einstellungen zu Ihrer Person Sie teilen oder auch nicht.**

- 28. Wir nennen Ihnen jetzt eine Reihe von Aussagen. Geben Sie bitte an, ob Sie den Aussagen eher zustimmen oder eher nicht zustimmen.**

|                                                                                                 | Stimme gar<br>nicht zu     |                            |                            |                            |                            | Stimme<br>vollkommen zu    |                            |
|-------------------------------------------------------------------------------------------------|----------------------------|----------------------------|----------------------------|----------------------------|----------------------------|----------------------------|----------------------------|
| Schwierigkeiten sehe ich gelassen entgegen, weil ich meinen Fähigkeiten immer vertrauen kann.   | <input type="checkbox"/> 1 | <input type="checkbox"/> 2 | <input type="checkbox"/> 3 | <input type="checkbox"/> 4 | <input type="checkbox"/> 5 | <input type="checkbox"/> 6 | <input type="checkbox"/> 7 |
| Für jedes Problem kann ich eine Lösung finden.                                                  | <input type="checkbox"/> 1 | <input type="checkbox"/> 2 | <input type="checkbox"/> 3 | <input type="checkbox"/> 4 | <input type="checkbox"/> 5 | <input type="checkbox"/> 6 | <input type="checkbox"/> 7 |
| Ich glaube, dass man auch als einzelner eine Menge bewegen kann, um anderen Menschen zu helfen. | <input type="checkbox"/> 1 | <input type="checkbox"/> 2 | <input type="checkbox"/> 3 | <input type="checkbox"/> 4 | <input type="checkbox"/> 5 | <input type="checkbox"/> 6 | <input type="checkbox"/> 7 |
| Wenn ich sehe, dass andere in Schwierigkeiten sind, biete ich spontan meine Hilfe an.           | <input type="checkbox"/> 1 | <input type="checkbox"/> 2 | <input type="checkbox"/> 3 | <input type="checkbox"/> 4 | <input type="checkbox"/> 5 | <input type="checkbox"/> 6 | <input type="checkbox"/> 7 |

- 29. Wie zufrieden sind Sie gegenwärtig, alles in allem, mit Ihrem Leben?**

Gar nicht zufrieden    ☐ 1    ☐ 2    ☐ 3    ☐ 4    ☐ 5    ☐ 6    ☐ 7    Sehr zufrieden

- 30. Sind Sie im Allgemeinen ein risikobereiter Mensch oder versuchen Sie, Risiken zu vermeiden?**

Gar nicht risikobereit    ☐ 1    ☐ 2    ☐ 3    ☐ 4    ☐ 5    ☐ 6    ☐ 7    Sehr risikobereit

**Jetzt wenden wir uns dem Thema Hitzebelastung zu. Denn neben Überschwemmungen sind auch Hitzewellen in den letzten Jahren im Freistaat Sachsen aufgetreten.**

- 31. Wie häufig waren Sie in der Vergangenheit bereits persönlich von einem Hitzeereignis betroffen?**

☐ Noch nie                      → Bitte weiter mit Frage 36  
☐ Einmal                      ☐ Zweimal                      ☐ Dreimal oder mehr

- 32. Wann genau war das letzte belastende Hitzeereignis?**

Monat: ..... Jahr: .....

- 33. Wie schwerwiegend war diese Hitzebelastung für Sie (z.B. gesundheitliche Probleme)?**

Überhaupt nicht schwerwiegend    ☐ 1    ☐ 2    ☐ 3    ☐ 4    ☐ 5    ☐ 6    ☐ 7    Sehr schwerwiegend

- 34. Wie machtlos haben Sie sich bei dieser Hitzebelastung gefühlt?**

Überhaupt nicht machtlos    ☐ 1    ☐ 2    ☐ 3    ☐ 4    ☐ 5    ☐ 6    ☐ 7    Sehr machtlos

**35. Wie sehr belastet Sie dieses Ereignis heute noch?**

Es belastet mich heute gar nicht mehr ☐ 1 ☐ 2 ☐ 3 ☐ 4 ☐ 5 ☐ 6 ☐ 7 Es belastet mich immer noch sehr

**36. Die letzten Hitzewellen in Deutschland sind auf den Klimawandel zurückzuführen.**

Stimme gar nicht zu ☐ 1 ☐ 2 ☐ 3 ☐ 4 ☐ 5 ☐ 6 ☐ 7 Stimme vollkommen zu

**37. Abschließend zum Thema Hitze bitten wir Sie, uns den folgenden Satz zu ergänzen: Der Gedanke an eine zukünftige Hitzewelle macht mir ...**

... keine Angst ☐ 1 ☐ 2 ☐ 3 ☐ 4 ☐ 5 ☐ 6 ☐ 7 ... sehr große Angst

Aus gegebenem Anlass möchten wir Sie auch fragen, wie sich die Corona-Pandemie auf Ihr Leben ausgewirkt hat.

**38. Die soziale Isolation aufgrund der Corona-Pandemie belastet mich sehr.**

Stimme gar nicht zu ☐ 1 ☐ 2 ☐ 3 ☐ 4 ☐ 5 ☐ 6 ☐ 7 Stimme vollkommen zu

**39. Seit Ausbruch des Corona-Virus nehme ich wahr, dass sich die Menschen in Mittweida verstärkt gegenseitig unterstützen.**

Stimme gar nicht zu ☐ 1 ☐ 2 ☐ 3 ☐ 4 ☐ 5 ☐ 6 ☐ 7 Stimme vollkommen zu

**40. Es wäre gesundheitlich sehr gefährlich für mich, mich mit dem Corona-Virus zu infizieren.**

Stimme gar nicht zu ☐ 1 ☐ 2 ☐ 3 ☐ 4 ☐ 5 ☐ 6 ☐ 7 Stimme vollkommen zu

**41. Wegen der Corona-Pandemie mache ich mir Sorgen darüber, mein Einkommen zu verlieren.**

Stimme gar nicht zu ☐ 1 ☐ 2 ☐ 3 ☐ 4 ☐ 5 ☐ 6 ☐ 7 Stimme vollkommen zu

**42. Wie viele Sorgen haben Sie sich vor der Corona-Pandemie um Ihre wirtschaftliche Zukunft gemacht?**

Keine Sorgen ☐ 1 ☐ 2 ☐ 3 ☐ 4 ☐ 5 ☐ 6 ☐ 7 Sehr große Sorgen

**43. Waren bzw. sind Sie, Ihres Wissens nach, an dem Corona-Virus erkrankt?**

☐ Ja  
☐ Nein

Vielen Dank, dass Sie den Fragebogen bis hierhin ausgefüllt haben. Abschließend haben wir noch ein paar Fragen zu Ihrer Person und zu Ihrem Haushalt. Diese Angaben dienen ausschließlich dazu, die Befragten in statistische Gruppen einzuteilen. Daher bitten wir Sie, auch diese Fragen noch vollständig zu beantworten.

44. Wie alt sind Sie? ..... Jahre

45. Sind Sie ...?

☐ ... männlich

☐ ... weiblich

☐ ... divers

46. Hat Ihre berufliche Tätigkeit mit Gefahren oder Schäden durch Katastrophen zu tun (z.B. Feuerwehr, THW, Versicherung o.ä.)?

☐ Nein

☐ Ja, und zwar bin ich in folgendem Bereich tätig:

.....

47. Üben Sie nebenberuflich oder ehrenamtlich Tätigkeiten aus, die mit Gefahren oder Schäden durch Katastrophen zu tun haben?

☐ Nein

☐ Ja, und zwar folgende Tätigkeit:

.....

48. Die Wohnung/das Haus in der ich/in dem ich lebe ist ...

☐ Gemietet

☐ Eigentum/Teileigentum

☐ Anderes, nämlich:

.....

49. In was für einem Haustyp wohnen Sie und wann wurde das Haus gebaut?

(ca.) Baujahr

☐ Freistehendes Einfamilienhaus

.....

☐ Doppelhaushälfte

.....

☐ Reihnhaus

.....

☐ Mehrfamilienhaus/Wohnblock

.....

☐ Anderer Typ, nämlich:

.....

50. In welchem Geschoss wohnen Sie? (mehrere Antworten sind möglich)

☐ Souterrain

☐ 3. Obergeschoss

☐ Erdgeschoss

☐ 4. Obergeschoss

☐ 1. Obergeschoss

☐ 5. Obergeschoss

☐ 2. Obergeschoss

☐ 6. Obergeschoss und höher

**51. Liegen von Ihnen genutzte Räume im Keller?**

☐ Ja

☐ Nein

**52. Wie viele Personen, Sie eingeschlossen, leben in Ihrem Haushalt?**

..... Personen

☐ Ich lebe allein.

→ Bitte weiter mit Frage 56

**53. Mit wem leben Sie in Ihrem Haushalt? Bitte geben Sie nur eine Antwort.**

☐ Mit Kind/ern (allein erziehend)

☐ Mit Partner/in, aber ohne Kind/er

☐ Mit Partner/in und Kind/ern

☐ Mit anderen Menschen in einer Wohngemeinschaft

☐ Mit meinen Eltern

☐ Mit meinen erwachsenen Kindern

☐ Mit anderen Personen, nämlich:

.....

**54. Wie viele Kinder leben in Ihrem Haushalt?**

..... Kind/Kinder unter 18 Jahre

..... Kind/Kinder 18 Jahre und älter

**55. Leben in Ihrem Haushalt auch behinderte bzw. dauerhaft kranke Personen?**

☐ Ja → Wenn ja, wie viele? ..... Personen

☐ Nein

**56. Was ist Ihr Familienstand?**

☐ Ledig

☐ Zusammenlebend

☐ Verheiratet

☐ Anderes, nämlich:

.....

**57. Was ist Ihr höchster schulischer Ausbildungsabschluss?**

☐ Hauptschul-/Volksschulabschluss, POS 8./9. Klasse

☐ Mittlere Reife/Realschulabschluss, POS 10. Klasse

☐ Hochschul-/Fachhochschulreife

☐ Ohne Abschluss/vor 8. Klasse abgegangen

☐ Anderer Schulabschluss, nämlich:

.....

**58. Was ist Ihr höchster beruflicher Ausbildungsabschluss?**

☐ Anlernzeit, Volontariat, Teilfacharbeiter

☐ Abgeschlossene Lehrausbildung, Berufsfachschule

☐ Meister-/Technikerabschluss, Fachschule

☐ Fachhochschulabschluss

☐ Hochschul-/Universitätsabschluss

☐ Ohne beruflichen Ausbildungsabschluss

☐ Noch in der Ausbildung (Ausbildung, Studium)

☐ Anderer Berufsabschluss, nämlich:

.....

**59. Was ist Ihr derzeitiger Erwerbsstatus?**

☐ Vollzeitbeschäftigt (mind. 35 h)

☐ Teilzeit- oder stundenweise erwerbstätig

☐ Arbeitslos/auf Arbeitssuche

☐ In Fortbildung oder Umschulung

☐ Bundesfreiwilligendienst

☐ In Ausbildung (Ausbildung, Studium)

☐ Hausfrau/Hausmann

☐ Im Mutterschutz/in der Elternzeit

☐ In Rente

☐ Aus anderen Gründen nicht erwerbstätig

**60. Wie hoch schätzen Sie das Nettoeinkommen ein, das Ihr Haushalt monatlich zur Verfügung hat?**

Denken Sie dabei an das Nettoeinkommen aller Haushaltsmitglieder, Kindergeld, Renten, Arbeitslosengeld, etc.

- |                                          |                                           |
|------------------------------------------|-------------------------------------------|
| <input type="checkbox"/> Bis 499 €       | <input type="checkbox"/> 1.700 – 1.999 €  |
| <input type="checkbox"/> 500 – 899 €     | <input type="checkbox"/> 2.000 – 2.599 €  |
| <input type="checkbox"/> 900 – 1.299 €   | <input type="checkbox"/> 2.600 – 3.199 €  |
| <input type="checkbox"/> 1.300 – 1.499 € | <input type="checkbox"/> 3.200 € und mehr |
| <input type="checkbox"/> 1.500 – 1.699 € | <input type="checkbox"/> Keine Angabe     |

**Vielen Dank für Ihre Mitarbeit bei der Befragung. Sie haben uns mit Ihren Antworten wirklich sehr geholfen.**

Abschließend noch zwei kurze Fragen:

**Haben Sie Interesse an den Ergebnissen dieser Befragung, zum Beispiel durch Informationen in der Zeitung oder die Vorstellung der Befragungsergebnisse auf einer Bürgerversammlung?**

- ☐ Ja, Informationen in der Zeitung (z.B. in den Mittweidaer Stadtnachrichten)
- ☐ Ja, Informationen auf einer Bürgerversammlung
- ☐ Nein

**Haben wir in unserem Fragebogen noch etwas Wichtiges vergessen?**

**Oder ist Ihrer Meinung nach irgendetwas zu kurz gekommen?**

Ihre Anmerkungen können Sie uns hier gern mitteilen.

.....

.....

.....

.....
